# Supplementary material
Source: Elsevier journal article supplement (https://www.sciencedirect.com/science/article/pii/S0300893218301829)
Supplement: mmc1 [file mmc1.pdf]

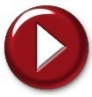

## **Material suplementario**

---

# **Oxigenador extracorpóreo de membrana venopulmonar percutáneo en la insuficiencia ventricular derecha**

---

**Vídeo 1 del material suplementario.** Resonancia magnética cardíaca, función ventricular.

**Vídeo 2 del material suplementario.** Implante del oxigenador extracorpóreo de membrana venopulmonar.

**Vídeo 3 del material suplementario.** Ecocardiograma que muestra la mejoría de la precarga izquierda suministrada por el oxigenador extracorpóreo de membrana y menor dilatación del ventrículo derecho.
